# Supplementary material for: Potentiating the cellular targeting and anti-tumor activity of Dp44mT via binding to human serum albumin: two saturable mechanisms of Dp44mT uptake by cells
Source: PubMed Central journal article supplement (PMC4496362; doi:10.18632/oncotarget.3606), 2015-03-15
Supplement: oncotarget-06-10374-s001.pdf [file oncotarget-06-10374-s001.pdf]

# Potentiating the cellular targeting and anti-tumor activity of Dp44mT *via* binding to human serum albumin: two saturable mechanisms of Dp44mT uptake by cells

## Supplementary Material

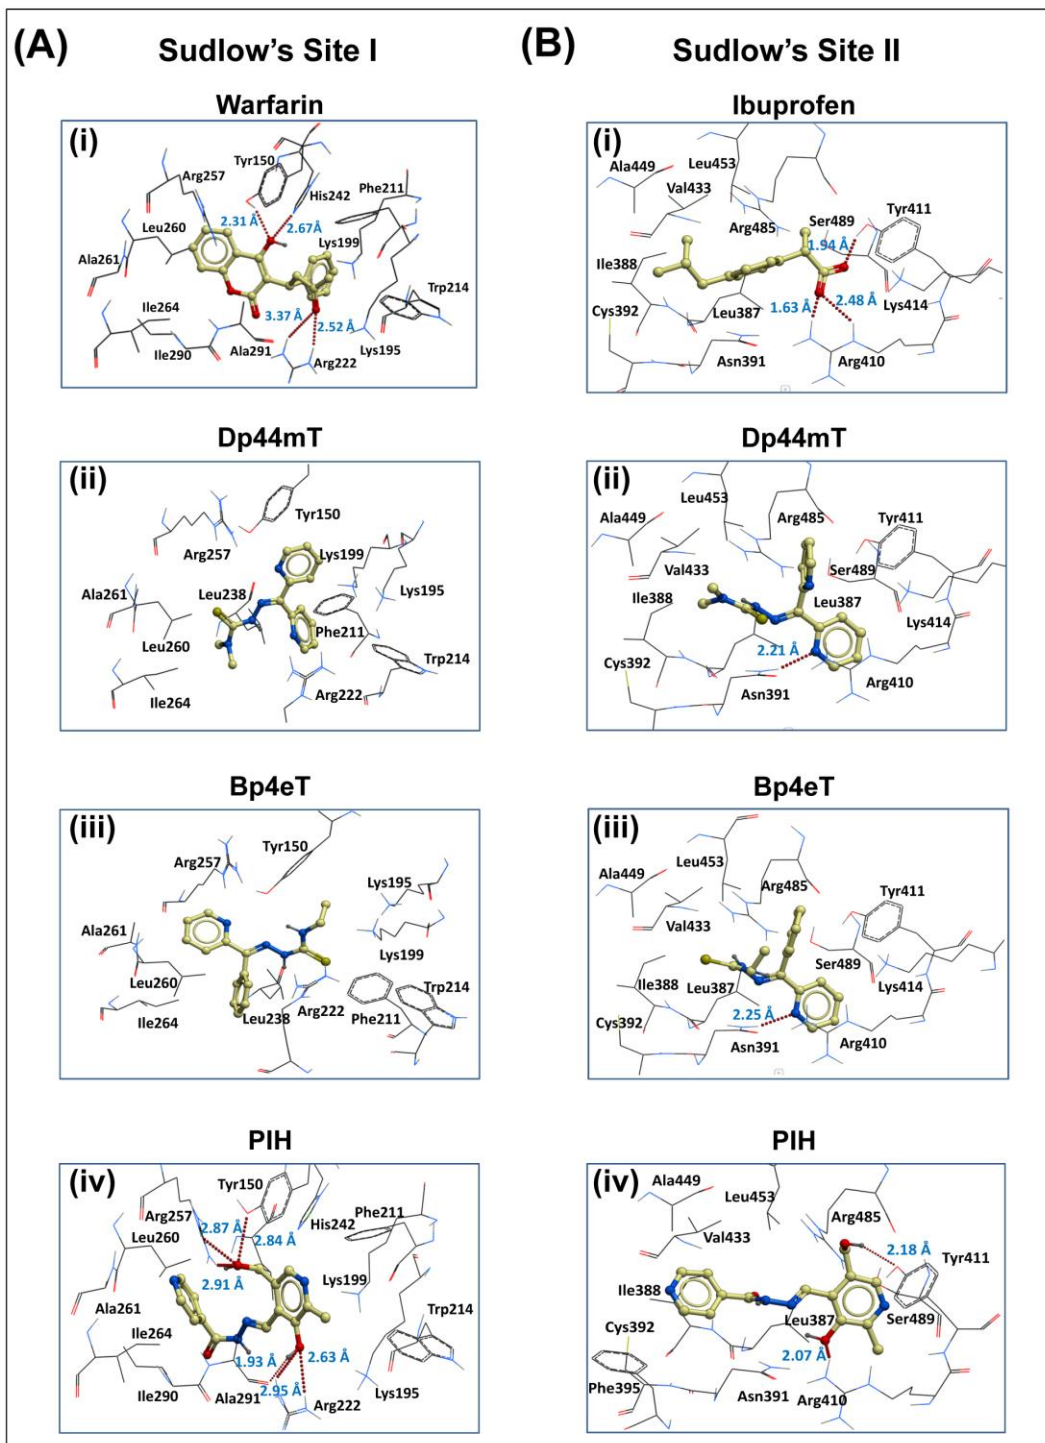

**Supplementary Figure 1: Docking results of warfarin, ibuprofen, Dp44mT, Bp4eT and PIH to HSA in: (A) Sudlow's site I (sub-domain IIA) and (B) Sudlow's site II (sub-domain IIIA). (A)** No direct H-bonds were formed between Dp44mT and Bp4eT, and Sudlow's site I, while PIH formed H-bonds with Tyr150, Arg422, Arg257 and Ala291 at this site. **(B)** At Sudlow's site II, Dp44mT and Bp4eT made a H-bond with Asn391, while PIH made H-bonds with Arg410 and Tyr411. H-bond distances are given in Å units.

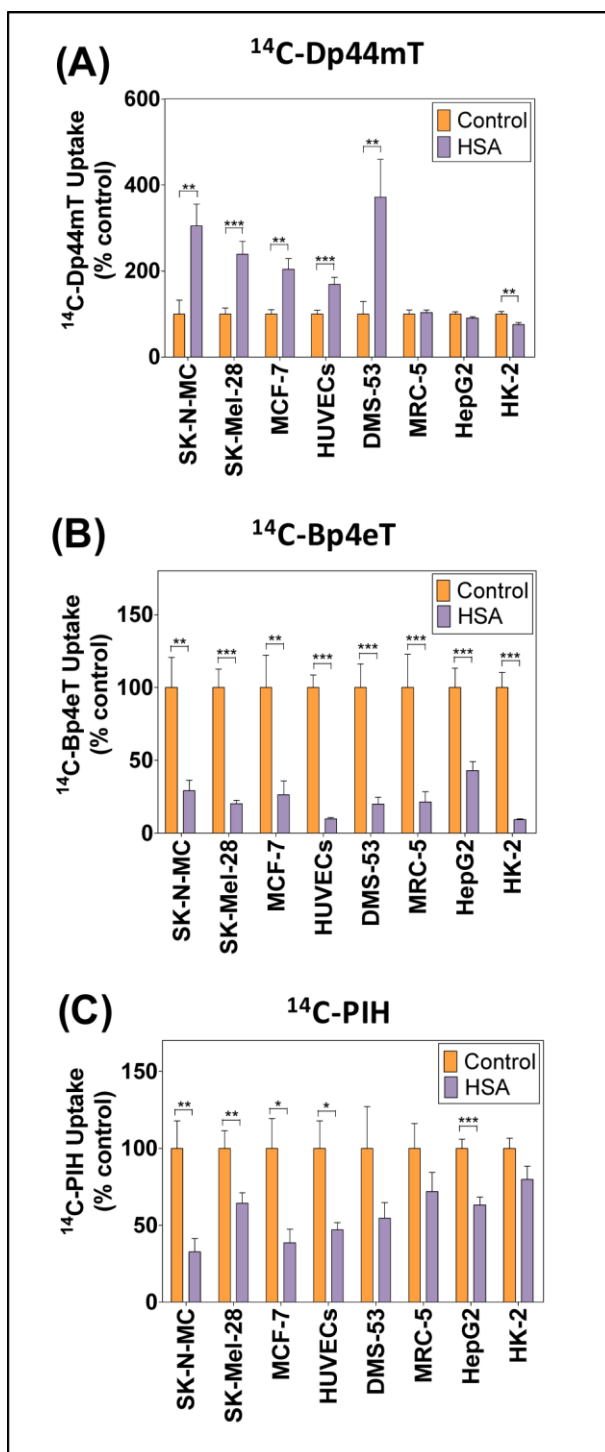

**Supplementary Figure 2: Effect of HSA on the uptake of: (A)  $^{14}\text{C}$ -Dp44mT, (B)  $^{14}\text{C}$ -Bp4eT and (C)  $^{14}\text{C}$ -PIH in a variety of cell lines at 37°C. Immortal cell-types (*i.e.*, SK-N-MC, SK-Mel-28, MCF-7, DMS-53, HepG2 and HK-2) and mortal cells (*i.e.*, MRC-5 and HUVECs) were**

incubated with 25  $\mu\text{M}$  of  $^{14}\text{C}$ -chelator in HSA-containing (40 mg/mL) media or protein-free media for 2 h/37°C. The cells were then washed 4 times using ice-cold PBS and the radioactivity was quantified. Results are expressed as mean  $\pm$  S.E.M. of at least 3 experiments. \*,  $p < 0.05$ ; \*\*,  $p < 0.01$ ; \*\*\*,  $p < 0.001$  relative to the control.
